# Supplementary material for: Fast simultaneous quantitation of valsartan and amlodipine besylate using an eco-friendly micellar HPLC-UV method: application to spiked human plasma and content uniformity testing for amlodipine
Source: Royal Society of Chemistry journal article supplement (doi:10.1039/c8ay01263f), 2018-01-01
Supplement: c8ay01263f1.pdf [file c8ay01263f1.pdf]

## **Fast simultaneous quantitation of valsartan and amlodipine besylate using Eco-friendly micellar HPLC-UV method: application to spiked human plasma and content uniformity testing for amlodipine**

**Fawzia A. Ibrahim, Amina M. El-Brashy, Mohamed I. El-Awady\* and  
Nora A. Abdallah**

Department of Pharmaceutical Analytical Chemistry, Faculty of Pharmacy,  
Mansoura University, Mansoura 35516, Egypt.

### **Supplementary Information**

- **Table S1:** Comparison between the reported HPLC methods and the proposed method.
- **Table S2:** Analytical eco-scale for assessment of greenness of the proposed method.
- **Scheme S1:** Greenness of solvents commonly used in analytical chemistry, based on solvent selection guides.
- **Details about Content Uniformity testing.**

---

\*Corresponding author.

Tel.: +20502246253, Fax: +20502363641, E-mail: mohamedelawady2@yahoo.com

**Table S1: Comparison between the reported HPLC methods and the proposed method.**

| Reference          | Range                                           | Mobile Phase                                                                                                            | Column                  | Detection                                | Run time | Application                                                           |
|--------------------|-------------------------------------------------|-------------------------------------------------------------------------------------------------------------------------|-------------------------|------------------------------------------|----------|-----------------------------------------------------------------------|
| 4                  | VAL: 112- 208 µg/mL<br>AML: 07- 13 µg/mL        | Methanol: Water<br>(62:38), pH at 3.0                                                                                   | C-18<br>Column          | UV<br>detection<br>at 230<br>nm          | 6.0 min  | tablets                                                               |
| 5                  | VAL: 160 - 480 µg/ml<br>AML: 10 - 30 µg/ml      | dihydrogen phosphate<br>buffer : acetonitrile<br>(55:45), pH 3.2                                                        | C-18<br>Column          | UV<br>detection<br>237 nm                | 2.0 min. | Tablets and<br>stability<br>study                                     |
| 6                  | VAL: 0.10 -20 µg/mL<br>AML: 0.01- 0.80<br>µg/mL | gradient elution with<br>aqueous 0.02% sodium<br>hexane sulfonate–<br>glacial acetic acid<br>(500:1,v/v) : acetonitrile | C-18<br>Column          | on-line<br>Fluoresce<br>nce<br>detection | 15.0 min | Tables and<br>rat plasma                                              |
| 7                  | VAL: 1–100 ng/mL<br>AML:10–1000 ng/mL           | phosphate<br>buffer:acetonitrile:meth<br>-anol (60:30:10), pH<br>4.0 ± 0.1                                              | Phenyl<br>Column        | on-line<br>fluoresce<br>nce<br>detection | 15.0 min | plasma                                                                |
| 8                  | VAL: 32-128 µg/ml<br>AML: 19.6-78.4 µg/ml       | water, acetonitrile and<br>glacial acetic acid<br>(300:700:1)                                                           | C-18<br>Column          | UV<br>detection<br>at 220<br>nm          | 6.0 min  | tablets                                                               |
| 9                  | VAL: 5-50 µg/ml<br>AML: 2-20 µg/ml              | acetonitrile-phosphate<br>buffer (50/50)                                                                                | C-18<br>Column          | UV<br>detection<br>at 254<br>nm.         | 5.0 min. | Tablets and<br>plasma                                                 |
| Proposed<br>method | VAL: 5-300 µg/ml<br>AML: 5-200 µg/ml            | 0.16 M sodium dodecyl<br>sulphate (SDS), 0.3%<br>triethylamine (TEA),<br>15% n-propanol, pH 2.5                         | Monolithic<br>18 Column | UV<br>detection<br>at 240<br>nm.         | 4.3 min  | Tablets,<br>plasma and<br>content<br>uniformity<br>testing for<br>AML |

**Table S2: Analytical eco-scale for assessment of greenness of the proposed method**

| Items of the method                                                   | Value                      | Penalty points |
|-----------------------------------------------------------------------|----------------------------|----------------|
| Reagent                                                               |                            |                |
| n-propanol                                                            | 10–100 mL                  | 4              |
| TEA                                                                   | 1–10 mL                    | 2              |
| SDS                                                                   |                            |                |
| o-phosphoric acid                                                     | 1–10 mL                    | 2              |
| Total penalty points (multiply the reagent amount and reagent hazard) |                            | 12             |
| Instruments                                                           |                            |                |
| Energy                                                                | <1.5 KWH per sample        | 1              |
| Occupational hazard                                                   | Emission of vapours to air | 1              |
| Waste                                                                 | 1–10 mL                    | 3              |
| Heater                                                                | No heating                 | 0              |
| Conditioning and washing time                                         | Normal                     | 0              |
| Total penalty points (sum of instrument points)                       |                            | 5              |
| Total penalty points                                                  |                            | 17             |
| Analytical Eco- Scale total score                                     | 100 -17                    | 83             |

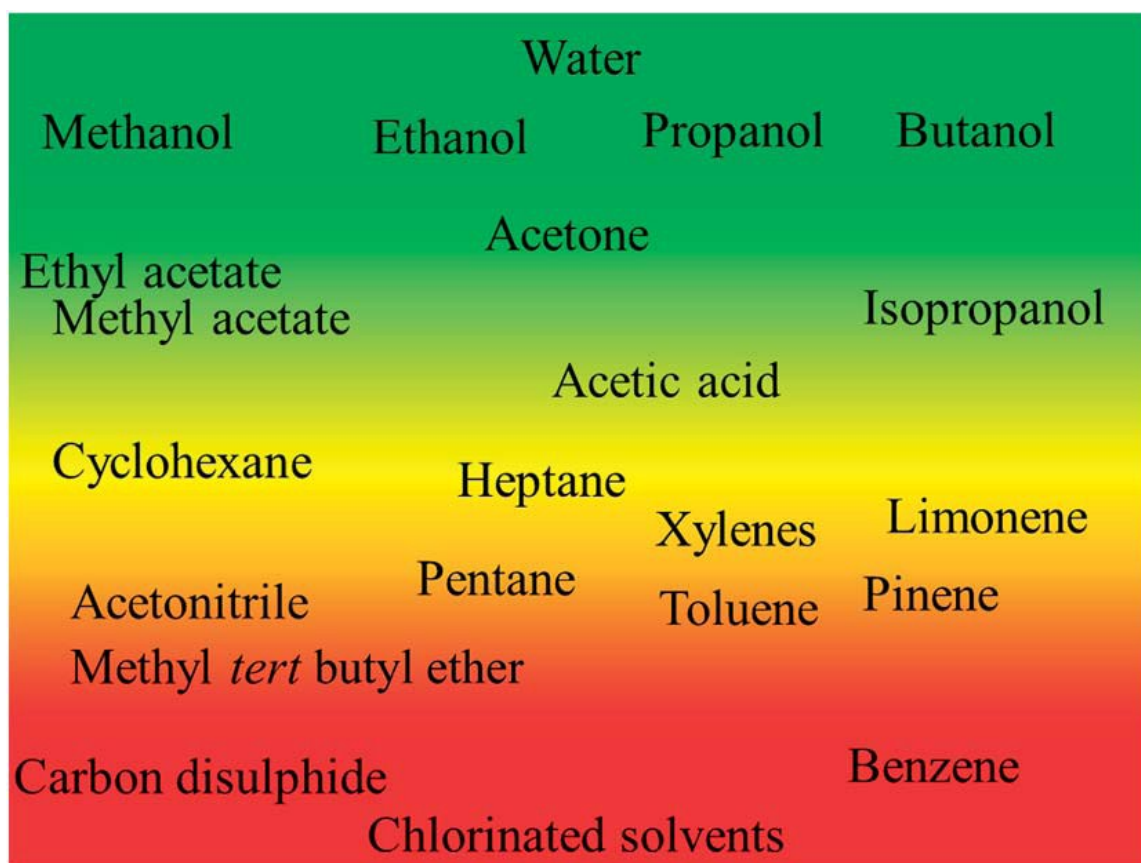

**Scheme S1: Greenness of solvents commonly used in analytical chemistry based on solvent selection guides**

[M. Tobiszewski, *Analytical Methods*, 2016, **8**, 2993-2999].

## Content Uniformity Test

Pharmaceutical products prior to their approval for market authorization are evaluated and tested according to their quality test specifications. Tests, described in the quality test specifications contain physical tests (appearance, average mass, etc.), chemical tests (assay, purity, etc.), and pharmaceutical tests (dissolution, content uniformity) [B. Banfai; K. Ganzler; S. Kemeny; *Content uniformity and assay requirements in current regulations*. J. Chromatogr. A 1156 (2007) 206-212]. Assay and content uniformity tests are two major aspects of drug quality assessment. Most quality attributes are regulated in the pharmacopoeias. The content uniformity tests are used for proving the uniform distribution of the active content in a production batch. It is performed by measuring the active content of individual dosage units. The British Pharmacopeia as well as the United States Pharmacopeia uses the same procedure for content uniformity testing.

The acceptance value is calculated from the following formula:

$$AV = |M - \bar{X}| + KS$$

Where:

**AV** is the acceptance value, **M** is a reference value that equals either;

98.5% if  $\bar{X} < 98.5\%$  **or**,  $\bar{X}$ ; if  $\bar{X}$  is between 98.5–101.5% **or**, 101.5% if  $\bar{X} > 101.5\%$  where  $\bar{X}$  is the mean of individual contents.

**k** is the acceptability constant (tolerance factor); it equals either; **2.4** if  $n=10$  or **2.0** if  $n=30$ .

**S** is the sample standard deviation.

**L1** is the maximum allowed acceptance value; it equals **15.0** unless otherwise specified in the individual monograph of the drug.

**L2** is the maximum allowed range for deviation of each dosage unit tested from the calculated value of **M**; it equals 25.0 unless otherwise specified in the individual monograph.

Thus, the acceptance value (**AV**) is calculated as the sum of two components, namely the difference of the observed mean and the reference value  $|M - \bar{X}|$  and the width of the tolerance interval (**KS**). Thus, the decision on accepting/rejecting a batch depends not only on the width of this interval but also on the shift of the mean from the nominal value.

Due to the high sensitivity of the proposed method and its ability to rapidly analyse a single tablet extract with sufficient accuracy, the method is ideally suited for content uniformity testing. The steps of the test were adopted according to the USP procedure. The acceptance value (**AV**) was calculated and it was found to be smaller than the maximum allowed acceptance value (**L1**). The results demonstrated excellent drug uniformity for AML.
